# Supplementary material for: The SUMOylation Pathway Components Are Required for Vegetative Growth, Asexual Development, Cytotoxic Responses, and Programmed Cell Death Events in Fusarium oxysporum f. sp. niveum
Source: MDPI journal article supplement (doi:10.3390/jof9010094), 2023-01-09
Supplement: s1 [file s1]

## Supplementary Material

### **The SUMOylation Pathway Components are Required for Vegetative Growth, Asexual Development, Cytotoxic Responses, and Programmed Cell Death Events in *Fusarium oxysporum* f. sp. *niveum***

**Azizullah <sup>1,2</sup>, Muhammad Noman <sup>1,2</sup>, Yizhou Gao <sup>1,2</sup>, Hui Wang <sup>1,2</sup>, Xiaohui Xiong <sup>1,2</sup>, Jiajing Wang <sup>1,2</sup>, Dayong Li <sup>1,2,\*</sup> and Fengming Song <sup>1,2,\*</sup>**

<sup>1</sup> Ministry of Agriculture Key Laboratory of Molecular Biology of Crop Pathogens and Insect Pests, Institute of Biotechnology, Zhejiang University, Hangzhou, Zhejiang 310058, China

<sup>2</sup> Key Laboratory of Biology of Crop Pathogens and Insects of Zhejiang Province, Institute of Biotechnology, Zhejiang University, Hangzhou, Zhejiang 310058, China

\* Correspondence: dyli@zju.edu.cn; fmsong@zju.edu.cn

| Motif | Symbol                                                                            | Motif Consensus                                    |
|-------|-----------------------------------------------------------------------------------|----------------------------------------------------|
| 1.    |  | YPTKPPKCKFVPPLFHPNVYPSGTVCLSILNEEEAWKPAITIKQILLGIQ |
| 2.    |  | MDAFCERQGKSPSSVRFLFDGTRVQPTDTPDTLEMEDGDTJEVHQEQIGG |
| 3.    |  | SADEIALYDRQIRLWGVKAQEKJRSANVLLITLKALANEIAKNLVLGIG  |
| 4.    |  | MSLCLNRLQEERKQWRKDHDPFGFYAKPQR                     |
| 5.    |  | SFNIINTATRJNNKPFYAAGVHGLYGFIFSDLIEHDFVIER          |
| 6.    |  | RSEFLRSFLQNJGSEJAPVTAILGGQLAQDVINVLGQRZQPIQNMLIFDG |
| 7.    |  | IGQNRAZAAAPAIQKLNPRVQVHVDTEIKEGPSYFAQFDIVIATDLDP   |
| 8.    |  | DLLBDPNPESPAQAEAYNLFKKDRAEYKRVRRVVKENPAP           |
| 9.    |  | TADGVLDLKNWECGIPGKEGTIWEGGLFK                      |
| 10.   |  | HLNIKVTDNNNEVFFKIKRTTKLKKL                         |
| 11.   |  | EREVISLRCPLTLQPFEDPVTNKKCNHTFEKEAILEYL             |
| 12.   |  | KENEKTIERYTKREDYSTFKLASHDALLPD                     |
| 13.   |  | RRLKAVTPVLSCLRALWEFQQIQNGRLPS                      |
| 14.   |  | LTILDHETVTEEDLGAQFFIS                              |
| 15.   |  | LELFTKLATQKHKALGLPSET                              |

**Figure S1.** Symbols and consensus sequences of the conserved motifs identified in FonSMT3, FonAOS1, FonUBC9, and FonMMS21 proteins.

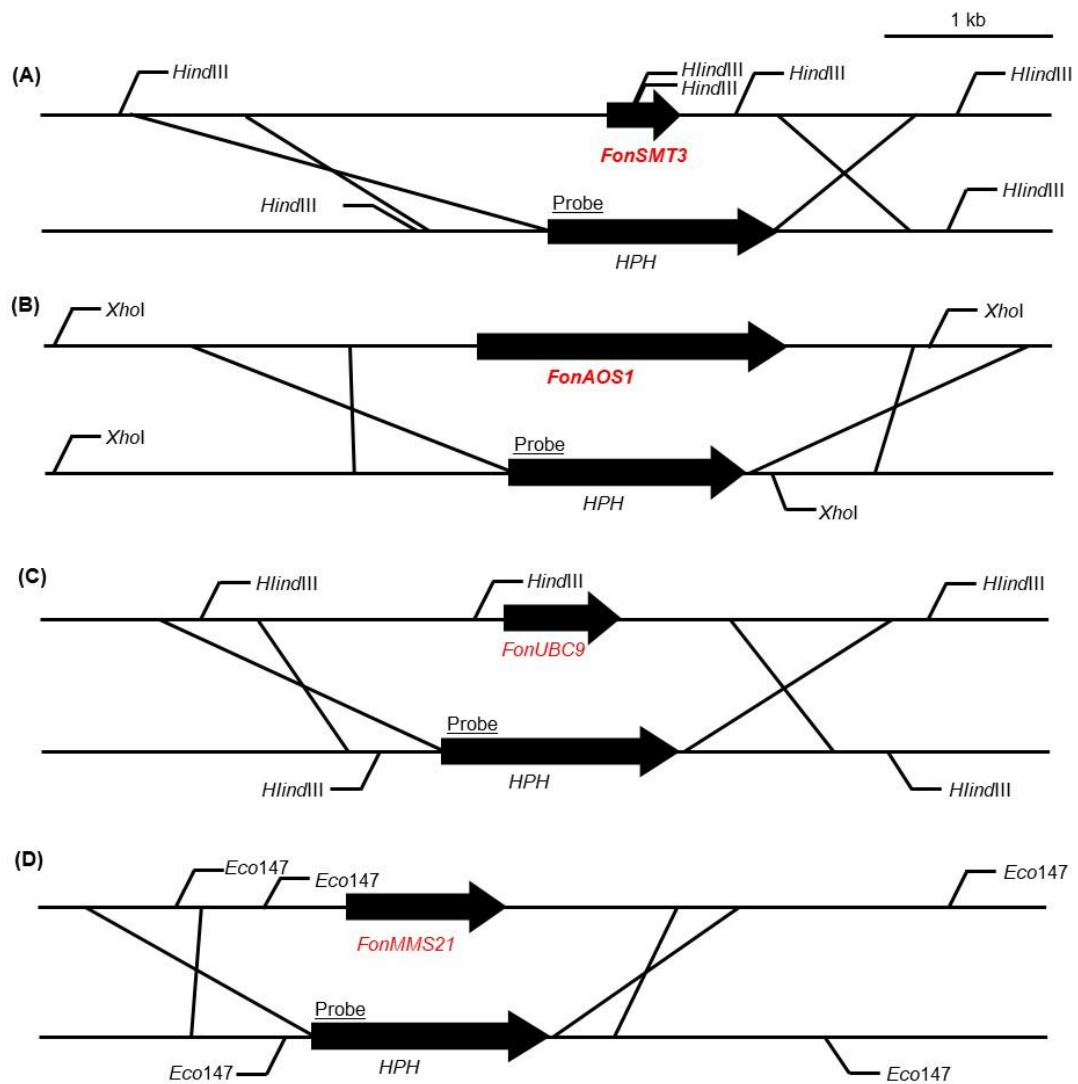

**Figure S2.** Schematic diagrams of the strategies used to generate the targeted deletion mutants for *FonSMT3* (A), *FonAOS1* (B), *FonUBC9* (C), and *FonMMS21* (D). *HPH*, hygromycin B resistance gene cassette. The *HPH* fragment used as a hybridization probe is indicated.

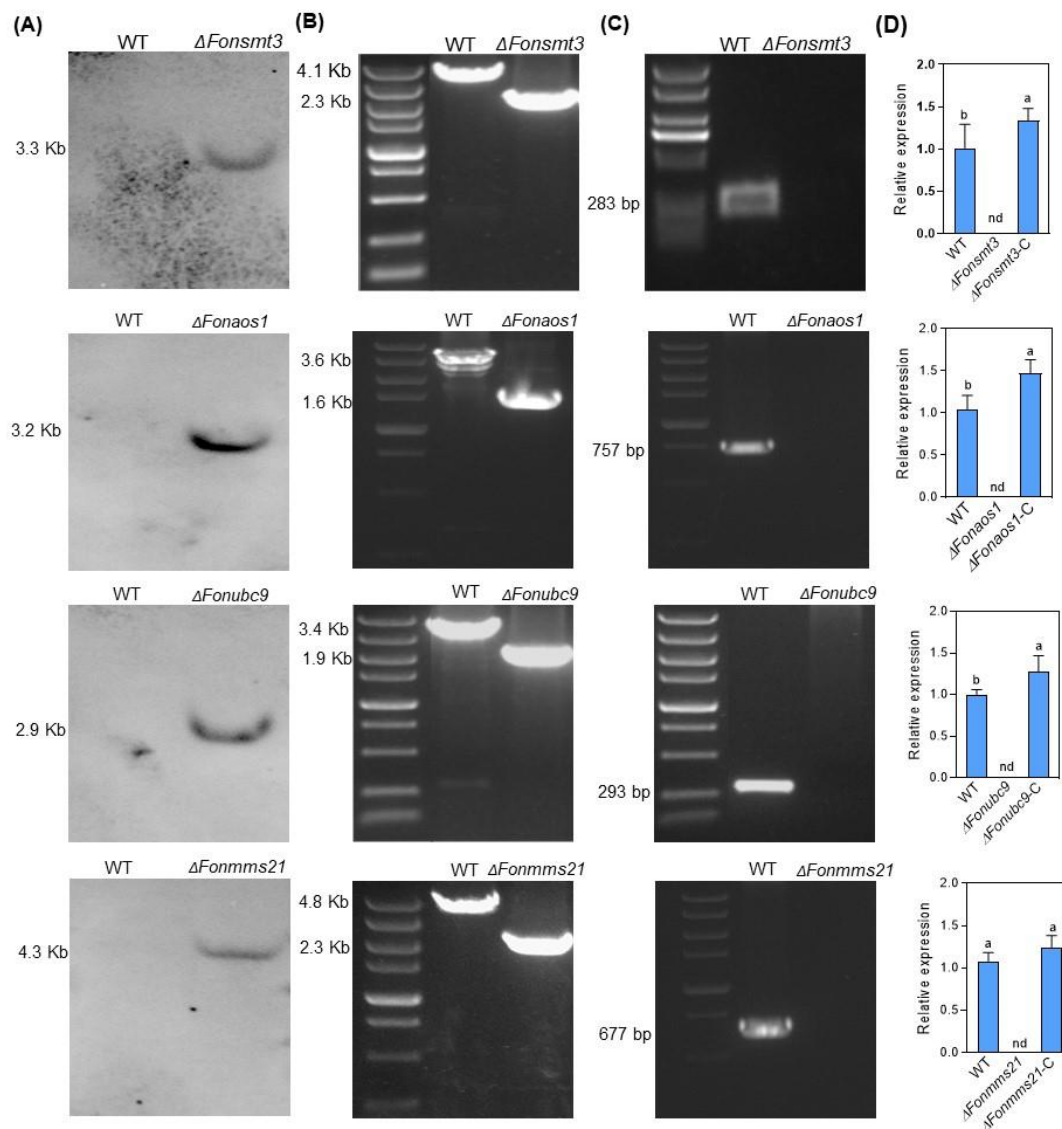

**Figure S3.** Characterization of the  $\Delta Fonsmt3$ ,  $\Delta Fonaos1$ ,  $\Delta Fonubc9$ , and  $\Delta Fonmms21$  strains. (A) Southern blotting validation of the deletion mutants. Genomic DNA was digested with appropriate restriction enzymes, separated by electrophoresis, and then transferred to Nitrocellulose membranes, followed by hybridization with the DIG-labeled *HPH* fragment probe. (B and C) PCR confirmation of the deletion mutants by amplifying (B) the inserted *HPH* cassette in comparison to WT and (C) gene fragments in WT in comparison to the deletion mutants. (D) RT-qPCR analysis of the transcript levels of the target genes in WT, deletion mutants, and complementation strains. The relative transcript levels in WT was set to 1 and the RT-qPCR data were normalized with *FonActin*. Data presented are the means  $\pm$ SD from three independent experiments and asterisks above the columns indicate the significant difference at  $p < 0.05$  level. nd, not detectable.

**Table S1.** Primers used in this study.

| Gene ID                               | Primer       | Sequence (5'-3')                                  |
|---------------------------------------|--------------|---------------------------------------------------|
| <i>Generation of deletion mutants</i> |              |                                                   |
| HPH                                   | HPH-F        | GGAGGTCAACACATCAATGCCTATT                         |
|                                       | HPH-R        | CTACTCTATTCCCTTGCCCT                              |
| FOMG_00702                            | SMT3-up-F    | TTGATTGAGGAGCGAGTG                                |
|                                       | SMT3-up-R    | CAAAATAGGCATTGATGTGTTGACCTCCTATTGGGCATGTTTACGG    |
| FOXG_09330                            | AOS1-up-F    | AACTTGGCGGTAGCGGTGAG                              |
|                                       | AOS1-up-R    | CAAAATAGGCATTGATGTGTTGACCTCCTCGCAGGCACAAAGGGTC    |
| FOXG_05489                            | UBC9-up-F    | CGATTCTTGATAAGCCATTC                              |
|                                       | UBC9-up-R    | CAAAATAGGCATTGATGTGTTGACCTCCAGTAAACCAGAAGCACCC    |
| FOXG_03253                            | MMS21-up-F   | TGAGGGATGAATGAACTGG                               |
|                                       | MMS21-up-R   | CAAAATAGGCATTGATGTGTTGACCTCCATCGTGATGGCGGGTAGA    |
| FOXG_07736                            | UBA2-up-F    | CGTTGTTCTGGCTTACCT                                |
|                                       | UBA2-up-R    | CAAAATAGGCATTGATGTGTTGACCTCCTTTCGCTTGGCTCATTCT    |
| FOXG_20319                            | SIZ1-up-F    | AGAATAGAACAAAGGAGGGA                              |
|                                       | SIZ1-up-R    | CAAAATAGGCATTGATGTGTTGACCTCCACGATGCCAAGGAGGATG    |
| FOMG_00702                            | SMT3-down-F  | CGTCCGAGGGCAAAGGAATAGAGTAGGAAGGGAAACAGACCAACC     |
|                                       | SMT3-down-R  | ACGACAAACCGAATCCAC                                |
| FOXG_09330                            | AOS1-down-F  | CGTCCGAGGGCAAAGGAATAGAGTAGTGTGGGTATCGTAGCAGC      |
|                                       | AOS1-down-R  | CGAAGTGGCAAAGAAAGG                                |
| FOXG_05489                            | UBC9-down-F  | CGTCCGAGGGCAAAGGAATAGAGTAGCCGCATGTCCGCTGTATT      |
|                                       | UBC9-down-R  | AGGGTTGTGCCTTAGTCG                                |
| FOXG_03253                            | MMS21-down-F | CGTCCGAGGGCAAAGGAATAGAGTAGTCTCATTGATAGATTCCCTCGTC |
|                                       | MMS21-down-R | CTTCCAGAATGGCTCGTT                                |
| FOXG_07736                            | UBA2-down-F  | CGTCCGAGGGCAAAGGAATAGAGTAGGGCATATTTAGAGGCGAGGAT   |
|                                       | UBA2-down-R  | AACCGATTGCTTGGTCAGG                               |
| FOXG_20319                            | SIZ1-down-F  | CGTCCGAGGGCAAAGGAATAGAGTAGACCGACACCTGAGTTGAA      |
|                                       | SIZ1-down-R  | GCAATGAAGAAGCACGACA                               |
| FOMG_00702                            | SMT3-nest-F  | TTGATTGAGGAGCGAGTG                                |
|                                       | SMT3-nest-R  | ACGACAAACCGAATCCAC                                |
| FOXG_09330                            | AOS1-nest-F  | AACTTGGCGGTAGCGGTGAG                              |
|                                       | AOS1-nest-R  | CGAAGTGGCAAAGAAAGG                                |
| FOXG_05489                            | UBC9-nest-F  | TGAGGGATGAATGAACTGG                               |
|                                       | UBC9-nest-R  | CTTCCAGAATGGCTCGTT                                |
| FOXG_03253                            | MMS21-nest-F | TGAGGGATGAATGAACTGG                               |
|                                       | MMS21-nest-R | CTTCCAGAATGGCTCGTT                                |
| FOXG_07736                            | UBA2-nest-F  | CGTTGTTCTGGCTTACCT                                |
|                                       | UBA2-nest-R  | AACCGATTGCTTGGTCAGG                               |
| FOXG_20319                            | SIZ1-nest-F  | AGAATAGAACAAAGGAGGGA                              |
|                                       | SIZ1-nest-R  | GCAATGAAGAAGCACGACA                               |

---

***Identification of deletion mutants***

|            |             |                        |
|------------|-------------|------------------------|
| FOMG_00702 | SMT3-ID1-F  | TCTCGTCGTTCTTCGTTT     |
|            | SMT3-ID1-R  | ATTCCATCCGCAGTGTTT     |
| FOXG_09330 | AOS1-ID1-F  | ACCCAGTTAGCCTCGTTC     |
|            | AOS1-ID1-R  | CTCACCCGCTGTTTCTTT     |
| FOXG_05489 | UBC9-ID1-F  | CTCCATAGTTCGCTTGATAG   |
|            | UBC9-ID1-R  | TCCACCTTCCTCGCTTGT     |
| FOXG_03253 | MMS21-ID1-F | TTATTGGGAGTCAAGTAGAGC  |
|            | MMS21-ID1-R | CCGAAAGTTATGGTGGTC     |
| FOXG_07736 | UBA2-ID1-F  | GTATTAGCTTGCTATGCGTGAG |
|            | UBA2-ID1-R  | GCGGCTCTGTTGTAACCATC   |
| FOXG_20319 | SIZ1-ID1-F  | CTGCTAAACGCCGATGAA     |
|            | SIZ1-ID1-R  | TGGCTCGCCGTATTGTCT     |
| FOMG_00702 | SMT3-ID2-F  | CAACAACGAGGTCTTCTTCA   |
|            | SMT3-ID2-R  | TATCGCCATCCTGCATCT     |
| FOXG_09330 | AOS1-ID2-F  | CTGTCAGTGCTGGTAAGTCC   |
|            | AOS1-ID2-R  | TGAGTCGTCGCTTGGATT     |
| FOXG_05489 | UBC9-ID2-F  | TTGGTCTGGTGGACTCTT     |
|            | UBC9-ID2-R  | GGATTTGTTTGACGGTGAT    |
| FOXG_03253 | MMS21-ID2-F | ATTACTTGGCTTTAGCGTCAG  |
|            | MMS21-ID2-R | TCCCTCTTGAGCGGTCTT     |
| FOXG_07736 | UBA2-ID2-F  | AGCAAGAGCAGCAGCAAA     |
|            | UBA2-ID2-R  | CCGTTGTCGGCATCAGTT     |
| FOXG_20319 | SIZ1-ID2-F  | CGCCCCGAAATACACCAAC    |
|            | SIZ1-ID2-R  | TTGCCTGAGTATCCGTTC     |
| HPH probe  | HPH-Probe-F | GGTTCATTTAGGCAACTGGT   |
|            | HPH-Probe-R | TGTAGTGTATTGACCGATTCC  |

---

***Construction of the complementation strains***

|            |                    |                                                              |
|------------|--------------------|--------------------------------------------------------------|
| FOMG_00702 | SMT3-nPYF11p1-F    | TTTCGTAGGAACCCAATCTTCAAAAATGGTGAGCAAGGGCGAGGAG               |
|            | SMT3-nPYF11p1-R    | CTCGCCAGGAGTTCCGTTTTTCGTTCTCGTTGGACATCTTGTACAGCTCGTCCA<br>T  |
|            | SMT3-nPYF11p2-F    | ATGTCCAACGAGAACGAAAA                                         |
|            | SMT3-nPYF11p2-R    | GTGCGCAGAGGAGCCTGAATGTTGAGTGGAATGATGTTACTGTGCAGATCCG<br>CCC  |
|            | SMT3-nPYF11-nest-F | TTTCGTAGGAACCCAATCTTCAAAAATGGTGAGCAAGGGCGAGGAG               |
|            | SMT3-nPYF11-nest-R | GTGCGCAGAGGAGCCTGAATGTTGAGTGGAATGATGTTACTGTGCAGATCCG<br>CCC  |
| FOXG_09330 | AOS1-PYF11-F       | TTTCGTAGGAACCCAATCTTCAAAAATGGACAACCTCGAACCAGGA               |
|            | AOS1-PYF11-R       | CACCACCCCGGTGAACAGCTCCTCGCCCTTGCTCACCTCTTTCGATTCCGAGG<br>CA  |
| FOXG_05489 | UBC9-PYF11-F       | TTTCGTAGGAACCCAATCTTCAAAAATGGCGCTTTGCCAGAACCGA               |
|            | UBC9-PYF11-R       | CACCACCCCGGTGAACAGCTCCTCGCCCTTGCTCACAGGTGTGGGGTTCTCG<br>CGAA |
| FOXG_03253 | MMS21-PYF11-F      | TTTCGTAGGAACCCAATCTTCAAAAATGTCTCGGAGAGGTATCAA                |

MMS21-PYF11-R

CACCACCCCGGTGAACAGCTCCTCGCCCTTGCTCACTTCTCCTCTCTTCTCCC  
TCT

---

***RT-qPCR***

|            |               |                         |
|------------|---------------|-------------------------|
| FOMG_00702 | SMT3-RT-F     | GCTTATGGGCGCTTTTTCG     |
|            | SMT3-RT-R     | TATCGGTGGGTTGGACTCGC    |
| FOXG_09330 | AOS1-RT-F     | CCTGGGATGGGCTTACCGAAT   |
|            | AOS1-RT-R     | TACAAAGCGACCTCGTCAGCA   |
| FOXG_05489 | UBC9-RT-F     | CTAACCCCGAGTCACCTGCC    |
|            | UBC9-RT-R     | ACTCGCTTCTCGTACTCGGC    |
| FOXG_03253 | MMS21-RT-F    | CAGAGCCGAATTGGAAGACGAAG |
|            | MMS21-RT-R    | TCGCCTTGTTGGGTCTCCA     |
| FOXG_01569 | FonActin-RT-F | GAGGGACCGCTCTCGTCGT     |
|            | FonActin-RT-R | GGAGATCCAGACTGCCGCTCAG  |

---

**Table S2.** The SUMOylation pathway components in *Fusarium oxysporum* and their similarity to the orthologs in *M. oryzae*.

| Components | Proteins | <i>F. oxysporum</i> | <i>M. oryzae</i> | Similarity | PF Domain                                    |
|------------|----------|---------------------|------------------|------------|----------------------------------------------|
| SUMO       | SMT3     | FOXG_00063          | MGG_05737        | 76%        | SUMO (PF11976)                               |
| E1         | AOS1     | FOXG_09330          | MGG_01669        | 55%        | Thif (PF00899)                               |
|            | UBA2     | FOXG_07736          | MGG_06733        | 61%        | Thif (PF00899), UAE (PF14732), UBA (PF10585) |
| E2         | UBC9     | FOXG_05489          | MGG_00970        | 85%        | ubiquitin-conjugating domain (PF00179)       |
| E3         | SIZ1     | FOXG_20319          | MGG_08837        | 51%        | zinc finger domains (PF14324), (PF02891)     |
|            | MMS21    | FOXG_03253          | MGG_0104)        | 35%        | SP-RING-type (PF11789)                       |



**Table S3.** Gene structure and motif organization of SMT3, AOS1, UBC9, and MMS21 in *Fusarium oxysporum*, *Homo sapiens*, *Phytophthora infestans*, and other fungi.

| Organisms                         | Accessions      | Genomic sequence<br>(bp) | CDS<br>(bp) | Exon/<br>intron | MEME motifs     |                                | Best hits by<br>SMART |
|-----------------------------------|-----------------|--------------------------|-------------|-----------------|-----------------|--------------------------------|-----------------------|
|                                   |                 |                          |             |                 | Uncharacterized | Characterized                  |                       |
| SMT3                              |                 |                          |             |                 |                 |                                |                       |
| <i>Fusarium oxysporum</i>         | XP_018231639.1  | 1600                     | 297         | 2/1             | 10              | 2 (ubiquitin)                  | UBQ                   |
| <i>Fusarium proliferatum</i>      | XP_031075851.1  | 410                      | 297         | 2/1             | 10              | 2 (ubiquitin)                  | UBQ                   |
| <i>Magnaporthe oryzae</i>         | XP_003710648.1  | 443                      | 330         | 2/1             | 10              | 2 (ubiquitin)                  | UBQ                   |
| <i>Colletotrichum graminicola</i> | XP_008093238.1  | 367                      | 303         | 3/2             | 10              | 2 (ubiquitin)                  | UBQ                   |
| <i>Botrytis cinerea</i>           | XP_024551758.1) | 1025                     | 291         | 2/1             | 10              | 2 (ubiquitin)                  | UBQ                   |
| <i>Aspergillus flavus</i>         | XP_041149378.1  | 347                      | 279         | 2/1             | 10              | 2 (ubiquitin)                  | UBQ                   |
| <i>Aspergillus nidulans</i>       | XP_658795.1     | 383                      | 285         | 2/1             | 10              | 2 (ubiquitin)                  | UBQ                   |
| <i>Blumeria graminis</i>          | EPQ65659.1      | 397                      | 312         | 2/1             | 10              | 2 (ubiquitin)                  | UBQ                   |
| <i>Saccharomyces cerevisiae</i>   | NP_010798.1     | 306                      | 306         | 1/0             | 10              | 2 (ubiquitin)                  | UBQ                   |
| <i>Schizosaccharomyces pombe</i>  | AAB71541.1      | 497                      | 354         | 5/4             | ~               | 2 (ubiquitin)                  | UBQ                   |
| <i>Candida albicans</i>           | XP_713803.1     | 309                      | 309         | 1/0             | 10              | 2 (ubiquitin)                  | UBQ                   |
| <i>Phytophthora infestans</i>     | XP_002903234.1  | 306                      | 306         | 1/0             | ~               | 2 (ubiquitin)                  | UBQ                   |
| <i>Homo sapiens</i>               | CAA67896.1      | 12446                    | 312         | 4/3             | ~               | 2 (ubiquitin)                  | UBQ                   |
| AOS1                              |                 |                          |             |                 |                 |                                |                       |
| <i>Fusarium oxysporum</i>         | XP_018246510.1  | 2536                     | 1719        | 2/1             | 14,5,12,13,15   | 3 (ThiF), 7 (ThiF), 6 (3KYD A) | Thif                  |
| <i>Fusarium proliferatum</i>      | XP_031081694.1  | 1771                     | 1716        | 2/1             | 14,5,12,13,15   | 3 (ThiF), 7 (ThiF), 6 (3KYD A) | Thif                  |
| <i>Magnaporthe oryzae</i>         | XP_003714655.1  | 2749                     | 1350        | 2/1             | 14,5,12,13,15   | 3 (ThiF), 7 (ThiF), 6 (3KYD A) | Thif                  |
| <i>Colletotrichum graminicola</i> | XP_008092598.1  | 1588                     | 1533        | 2/1             | 14,5,12,13,15   | 3 (ThiF), 7 (ThiF), 6 (3KYD A) | Thif                  |
| <i>Botrytis cinerea</i>           | EMR89522.1      | 1954                     | 1206        | 2/1             | 14,5,12,13,15   | 3 (ThiF), 7 (ThiF), 6 (3KYD A) | Thif                  |

|                                  |                |       |      |     |                |                                |      |
|----------------------------------|----------------|-------|------|-----|----------------|--------------------------------|------|
| <i>Aspergillus flavus</i>        | RAQ50318.1     | 1387  | 1185 | 4/3 | 14,5,12,13,15  | 3 (ThiF), 7 (ThiF), 6 (3KYD A) | Thif |
| <i>Aspergillus nidulans</i>      | XP_659902.1    | 1314  | 1191 | 3/2 | 14,5,12,13,15  | 3 (ThiF), 7 (ThiF), 6 (3KYD A) | Thif |
| <i>Blumeria graminis</i>         | EPQ63982.1     | 1284  | 1230 | 2/1 | 5,12,13, 14,15 | 3 (ThiF), 7 (ThiF), 6 (3KYD A) | Thif |
| <i>Saccharomyces cerevisiae</i>  | EGA76517.1     | 1040  | 1044 | 1/0 | 5,14,          | 3 (ThiF), 7 (ThiF)             | Thif |
| <i>Schizosaccharomyces pombe</i> | NP_593251.1    | 1510  | 924  | 5/4 | 14,5           | 3 (ThiF), 7 (ThiF), 6 (3KYD A) | Thif |
| <i>Candida albicans</i>          | KGQ83238.1     | 1170  | 1170 | 1/0 | 14,5           | 3 (ThiF), 6 (3KYD A)           | Thif |
| <i>Phytophthora infestans</i>    | XP_002896819.1 | 1132  | 954  | 4/3 | 14,5           | 3 (ThiF), 7 (ThiF), 6 (3KYD A) | Thif |
| <i>Homo sapiens</i>              | NP_001139185.1 | 79801 | 900  | 7/6 | 14,5           | 3 (ThiF), 7 (ThiF)             | Thif |

#### UBC9

|                                   |                |       |     |     |     |                      |      |
|-----------------------------------|----------------|-------|-----|-----|-----|----------------------|------|
| <i>Fusarium oxysporum</i>         | XP_018240801.1 | 2646  | 474 | 4/3 | 4,9 | 1(UQ_con), 8(UQ_con) | UBCc |
| <i>Fusarium proliferatum</i>      | KAG4264306.1   | 631   | 474 | 4/3 | 4,9 | 1(UQ_con), 8(UQ_con) | UBCc |
| <i>Magnaporthe oryzae</i>         | XP_003717980.1 | 1656  | 474 | 4/3 | 4,9 | 1(UQ_con), 8(UQ_con) | UBCc |
| <i>Colletotrichum graminicola</i> | XP_008092998.1 | 664   | 477 | 4/3 | 4,9 | 1(UQ_con), 8(UQ_con) | UBCc |
| <i>Botrytis cinerea</i>           | XP_001557575.1 | 1105  | 477 | 4/3 | 4,9 | 1(UQ_con), 8(UQ_con) | UBCc |
| <i>Aspergillus flavus</i>         | KAB8246909.1   | 728   | 474 | 4/3 | 4,9 | 1(UQ_con), 8(UQ_con) | UBCc |
| <i>Aspergillus nidulans</i>       | AAX89142.1     | 1652  | 474 | 4/3 | 4,9 | 1(UQ_con), 8(UQ_con) | UBCc |
| <i>Blumeria graminis</i>          | EPQ63458.1     | 569   | 450 | 2/1 | 4,9 | 1(UQ_con), 8(UQ_con) | UBCc |
| <i>Saccharomyces cerevisiae</i>   | NP_010219.1    | 584   | 474 | 2/1 | 4,9 | 1(UQ_con)            | UBCc |
| <i>Schizosaccharomyces pombe</i>  | NP_593204.1    | 1286  | 474 | 6/5 | 4,9 | 1(UQ_con)            | UBCc |
| <i>Phytophthora infestans</i>     | XP_002903310.1 | 483   | 483 | 1/0 | 4,9 | 1(UQ_con), 8(UQ_con) | UBCc |
| <i>Homo sapiens</i>               | 2GRR_A         | 17886 | 516 | 7/6 | 4,9 | 1(UQ_con), 8(UQ_con) | UBCc |

#### MMS21

|                                   |                |      |      |     |    |              |        |
|-----------------------------------|----------------|------|------|-----|----|--------------|--------|
| <i>Fusarium oxysporum</i>         | XP_018237250.1 | 1586 | 1125 | 2/1 | 12 | zf-RING_UBOX | zf-Nse |
| <i>Fusarium proliferatum</i>      | XP_031082828.1 | 1175 | 490  | 2/1 | 12 | zf-RING_UBOX | zf-Nse |
| <i>Magnaporthe oryzae</i>         | XP_003717900.1 | 1972 | 1245 | 2/1 | 12 | zf-RING_UBOX | zf-Nse |
| <i>Colletotrichum graminicola</i> | XP_008094278.1 | 1306 | 1254 | 2/1 | 12 | zf-RING_UBOX | zf-Nse |

|                                  |                |      |      |     |    |              |              |
|----------------------------------|----------------|------|------|-----|----|--------------|--------------|
| <i>Botrytis cinerea</i>          | XP_001555237.1 | 1603 | 1290 | 2/1 | 12 | zf-RING_UBOX | zf-Nse       |
| <i>Aspergillus flavus</i>        | KOC10680.1     | 1553 | 1461 | 2/1 | 12 | zf-RING_UBOX | zf-Nse       |
| <i>Aspergillus nidulans</i>      | CBF85821.1     | 1815 | 1509 | 2/1 | 12 | zf-RING_UBOX | zf-Nse       |
| <i>Blumeria graminis</i>         | EPQ67616.1     | 1256 | 1086 | 4/3 | 12 | zf-RING_UBOX | zf-Nse       |
| <i>Saccharomyces cerevisiae</i>  | 7P47_A         | 804  | 804  | 1/0 | 0  | zf-RING_UBOX | zf-Nse       |
| <i>Schizosaccharomyces pombe</i> | NP_001343015.1 | 1405 | 753  | 3/2 | 12 | zf-RING_UBOX | zf-Nse       |
| <i>Phytophthora infestans</i>    | XP_002906313.1 | 996  | 729  | 5/4 | 0  | zf-RING_UBOX | zf-RING_UBOX |
| <i>Homo sapiens</i>              | NP_001336414.1 | 8306 | 744  | 6/5 | 0  | zf-RING_UBOX | zf-RING_UBOX |

---
